# Supplementary material for: Pain hypersensitivity in juvenile idiopathic arthritis: a quantitative sensory testing study
Source: PubMed Central journal article supplement (PMC4171552; doi:10.1186/1546-0096-12-39), 2014-09-06
Supplement: 12969_2014_2159_MOESM2_ESM.pdf [file 12969_2014_2159_MOESM2_ESM.pdf]

**Supplementary Table A: Absolute QST values in children with JIA and healthy controls at the thenar eminence<sup>a</sup>.**

| QST parameter             | Control-US<br>(n=92) | Control-EU<br>(n=151) | JIA<br>(n=60) <sup>b</sup> | <i>p-value</i> <sup>c</sup>                    |
|---------------------------|----------------------|-----------------------|----------------------------|------------------------------------------------|
| <b>Innocuous Stimulus</b> |                      |                       |                            |                                                |
| MDT (g)                   | ---                  | 0.23 (0.18-0.33)      | 0.04 (0.28-0.07)           | <b>&lt;0.0001</b>                              |
| VDT (µm/sec)              | 0.2 (0.2-0.25)       | ---                   | 0.68 (0.53-0.90)           | <b>&lt;0.001</b>                               |
| CDT (°C)                  | 30.6 (30.0-30.9)     | 31.1 (30.6-31.3)      | 30.2 (29.5-30.6)           | <b>US: &lt;0.01</b><br><b>EU: &lt;0.001</b>    |
| WDT (°C)                  | 33.7 (33.4-34.1)     | 33.4 (33.1-34.0)      | 34.8 (34.1-35.5)           | <b>US: &lt;0.0001</b><br><b>EU: &lt;0.0001</b> |
| <b>Noxious Stimulus</b>   |                      |                       |                            |                                                |
| PPT (N)                   | ---                  | 45.8 (35.6-55.6)      | 10.3 (6.3-15.5)            | <b>&lt;0.001</b>                               |
| CPT (°C)                  | 13.8 (5.1-21.4)      | 21.6 (13.4-25.2)      | 25.6 (17.3-28.9)           | <b>US: &lt;0.001</b><br><b>EU: &lt;0.01</b>    |
| HPT (°C)                  | 42.3 (39.6-47.2)     | 40.6 (38.1-43.9)      | 38.2 (36.0-42.3)           | <b>US: &lt;0.001</b><br><b>EU: &lt;0.05</b>    |

Children with JIA have increased sensitivity to touch, pressure, cold and heat pain compared to healthy controls.

CDT, Cold Detection Threshold, CPT, Cold Pain Threshold; EU, European control; HPT, Heat Pain Threshold; IQR, Inter-Quartile Range; MDT-Mechanical Detection Threshold; MPT, Mechanical Pain Threshold; PPT, Pressure Detection Threshold; US, US control; VDT, Vibration Detection Threshold; WDT, Warm Detection Threshold.

<sup>a</sup>. All values are given as median (IQR). <sup>b</sup>. 60 JIA patients included in the analysis except vibration (n=53), thermal (n=56) and pressure (n=58) stimulus modalities where data was not available due to technical issues. <sup>c</sup>. *p*-values indicate differences in sensory threshold between Control and JIA groups. Mann-Whitney *U*-test and Kruskal-Wallis with Dunn's post-hoc test used where appropriate.
